# Supplementary material for: MOR/DEA/TEA mixed-template synthesis of CHA-type SAPO with different silica and alumina sources
Source: Royal Society of Chemistry journal article supplement (doi:10.1039/d1nj03836b), 2021-01-01
Supplement: d1nj03836b1.pdf [file d1nj03836b1.pdf]

**NEW JOURNAL OF CHEMISTRY**  
**SUPPLEMENTARY INFORMATION**

**MOR/DEA/TEA mixed-template synthesis of CHA-type SAPO with different silica and alumina sources**

Marzieh Hamidzadeh <sup>1</sup>, Mohadese Nazari<sup>2</sup>, Maryam Rahimi Fard<sup>1</sup>

<sup>1</sup> National Petrochemical Company, Petrochemical Research and Technology Company, Tehran 1435884711, Iran

<sup>2</sup> Department of Chemical Engineering, Esfarayen University of Technology, Esfarayen, North Khorasan, 9661998195, Iran

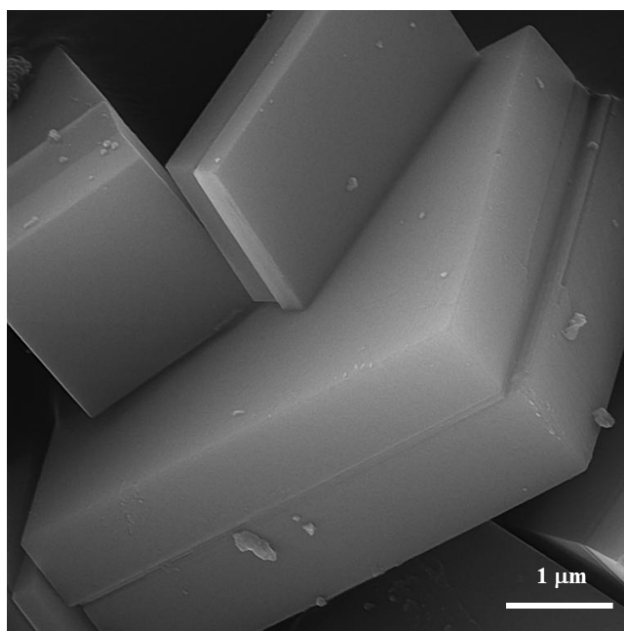

**Figure S1.** Crystal twinning of sample PB-SS as a characteristic of SAPO-44

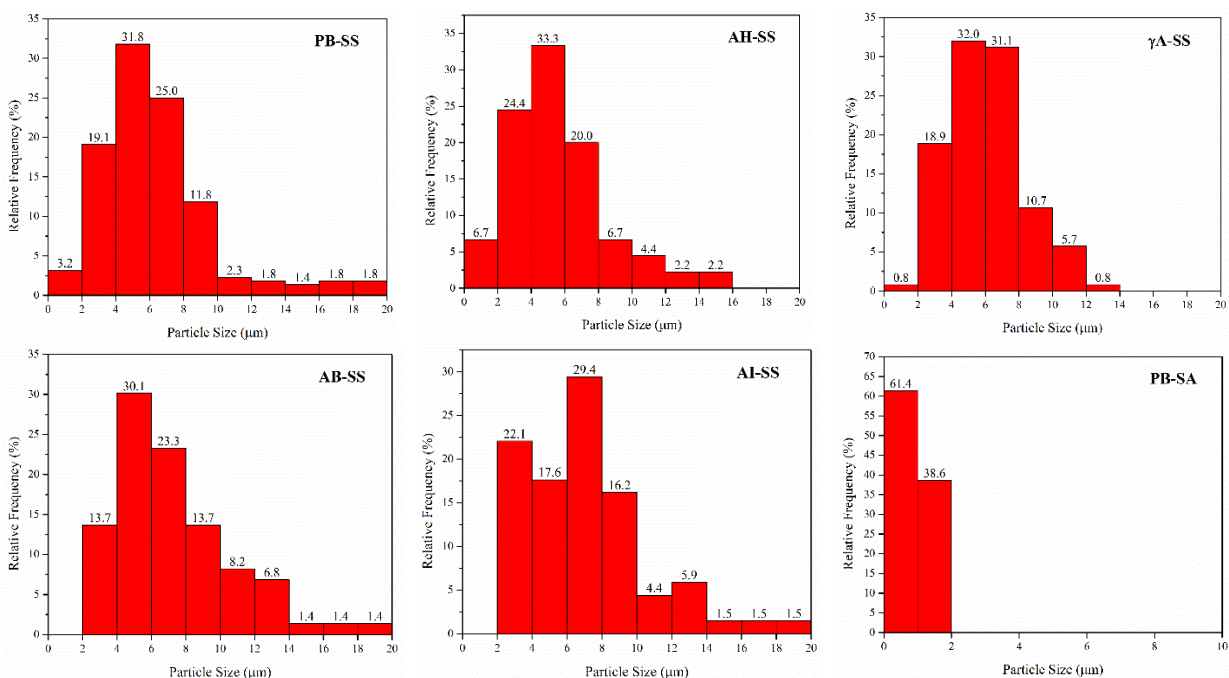

**Figure S2.** A particle size distribution histogram determined from the SEM images of the crystalline samples

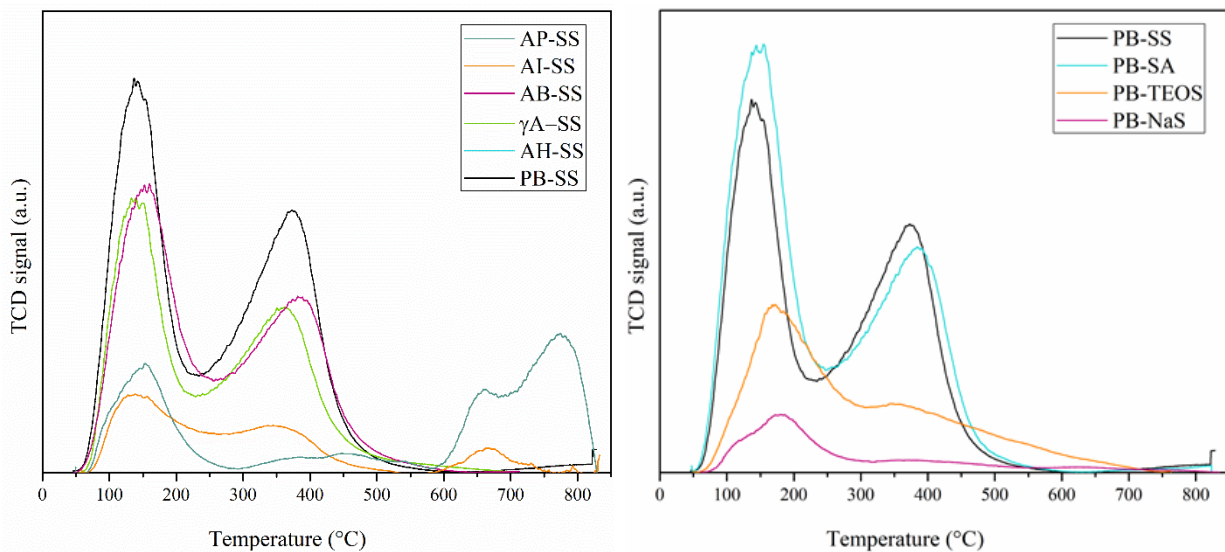

**Figure S3.** NH<sub>3</sub>-TPD curves of the samples synthesized with different alumina sources (left figure) and different silica sources (right figure)

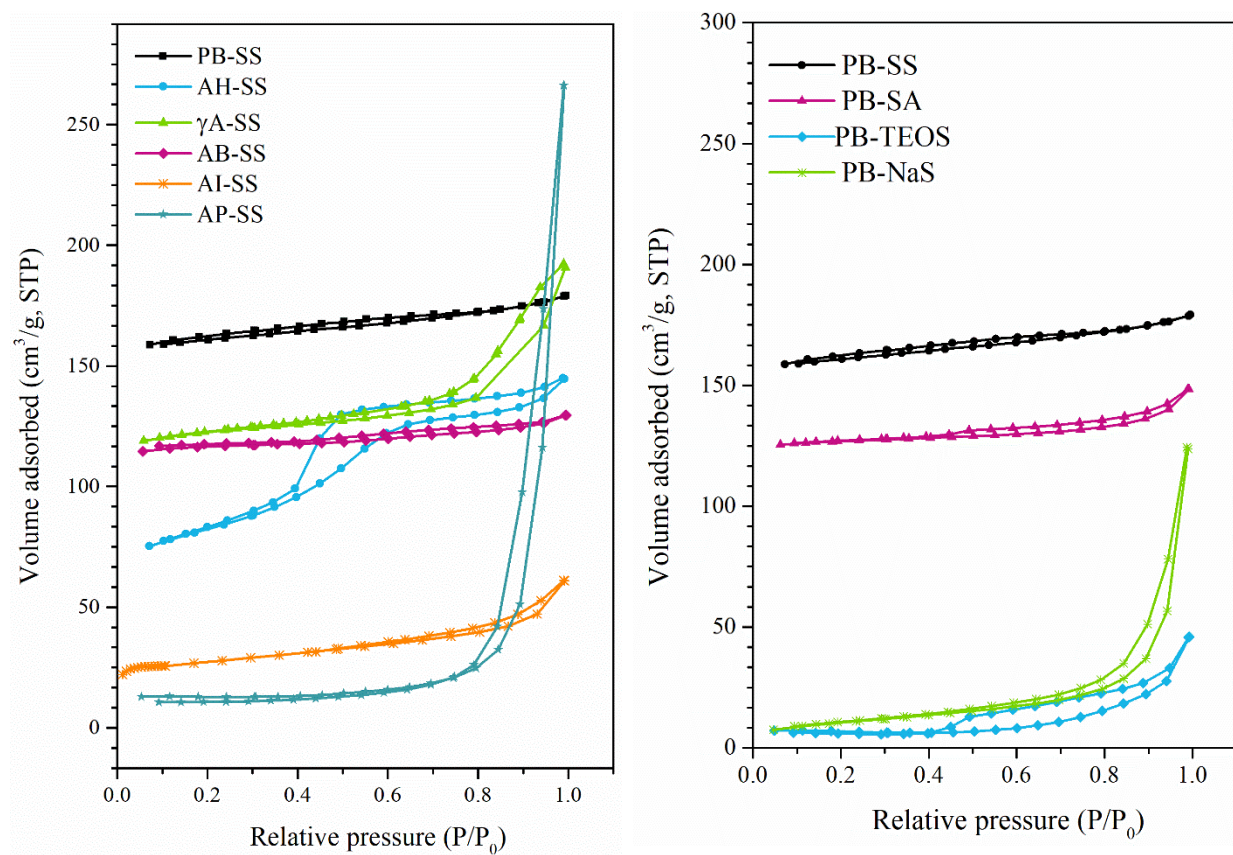

**Figure S4.** N<sub>2</sub> adsorption–desorption isotherms of the samples synthesized with different alumina sources (left figure) and different silica sources (right figure)
